# Supplementary material
Source: ML conference proceedings conference paper supplement (https://openaccess.thecvf.com/content/CVPR2024/html/Choi_OmniLocalRF_Omnidirectional_Local_CVPR_2024_paper.html)
Supplement: Supplementary file 1 [file Choi_OmniLocalRF_Omnidirectional_Local_CVPR_2024_supplemental.zip]

Archive with 2 entries (2 files):
- 3021_supp.pdf
- 3021_video.mp4
