# Supplementary material
Source: ML conference proceedings conference paper supplement (https://openaccess.thecvf.com/content/CVPR2024/html/Choi_OmniLocalRF_Omnidirectional_Local_CVPR_2024_paper.html)
Supplement: Supplementary file 1 [file Choi_OmniLocalRF_Omnidirectional_Local_CVPR_2024_supplemental.zip › 3021_supp.pdf]

# OmniLocalRF: Omnidirectional Local Radiance Fields from Dynamic Videos

## Supplementary Material

### 1. Implementation Details

We schedule learning rate and upsampling based on frames per RF block to balance iteration over blocks, following LocalRF [7].

#### 1.1. Regularizers for Motion Mask

We employ a total variation loss  $\mathcal{L}_{TV}^{\text{mask}}$  and a binary entropy [11] like function  $\mathcal{L}_{\text{bin}}^{\text{mask}}$  to regularize the motion mask. Total variation is commonly utilized for smoothing a target and we adapt it as follows:

$$\mathcal{L}_{TV}^{\text{mask}} = \Delta^2 M_x + \Delta^2 M_y + 0.1 \cdot \Delta^2 M_t, \quad (1)$$

where  $M_x$ ,  $M_y$  and  $M_t$  denote the predicted mask value along the  $x$ ,  $y$  and temporal axes. Here,  $\Delta^2$  represents a squared difference between neighboring values along the axes. Considering object movement over time, we impose a relatively small weight along the temporal axis. Additionally, we enforce the mask to converge into a binary value using

$$\mathcal{L}_{\text{bin}}^{\text{mask}} = M(r)^2(1 - M(r))^2. \quad (2)$$

The function exhibits a similar shape to the binary entropy regularizer, used as a slightly modified form in D<sup>2</sup>NeRF [10] for the same purpose.

#### 1.2. Optimization Details

In our method, we insert frames every 100 iterations. The insertion process stops when the distance between the inserted frames and the center of the current radiance block exceeds 1. This distance is equivalent to the radius of the contraction fields. After that, we optimize the blocks until the iteration reaches the number of frames in the current block multiplied by 600. The resolution of RF blocks increases exponentially from  $64^3$  to  $640^3$  at iterations [100, 150, 200, 250, 300] times the number of frames in the block. Once we optimize the block, a new radiance block is created to overlap frames with the previous block for further optimization.

For pose estimation, we follow the camera parameterization of LocalRF. The rotation matrix comprises two perpendicular vectors with their cross-product, and the translation matrix is defined in Euclidean space. During training, the camera pose is updated by photometric error while training RF blocks. Test views are solely used to optimize the pose without contributing to the training of RF blocks. We train our model for each scene using 155K iterations. Our method utilizes adaptive sampling, as proposed in TensorRF [2]. The number of samples exponentially increases

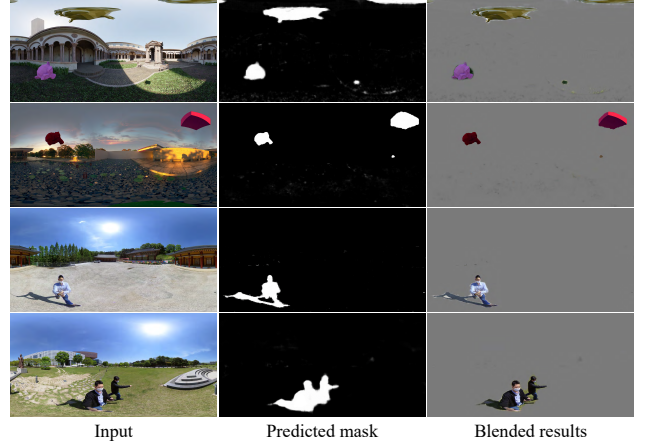

Figure 1. Predicted motion mask results. The second column is estimation results from our mask module, and the last column shows blended results with the input images.

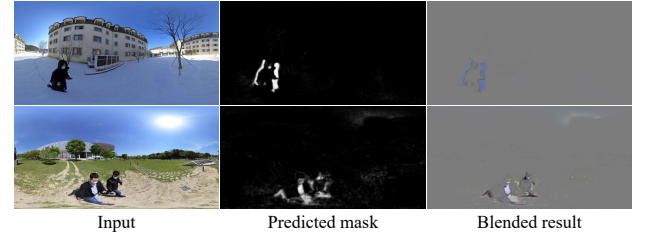

Figure 2. Predicted mask results without photometric supervision of the ground truth. Unresolving factorization ambiguity often leads to an intermediate alpha value of the motion mask, leaving dynamic artifacts on the static geometry.

from 219 to 2, 214 at the upsampling iteration. We initiate a backward step after completing the upsampling of the current radiance block. We do not perform a backward step during frame insertion as it could contaminate the previous radiance fields due to the inaccurate pose of the current frames.

#### 1.3. Hyperparameters

We set the volumetric density channel to 8 for the RF block’s volumetric density channel and 24 for its color channel. For both the MLP used to decode color from radiance blocks and the MLP used to estimate dynamic components, we use 2 layers with 128 hidden nodes. We adopt the Adam optimizer [4] with  $\beta_1 = 0.9$  and  $\beta_2 = 0.99$  to train all parameters. To account for the distinct convergence speeds of each parameter, we use different learning rate schedules. The learning rate for radiance blocks and

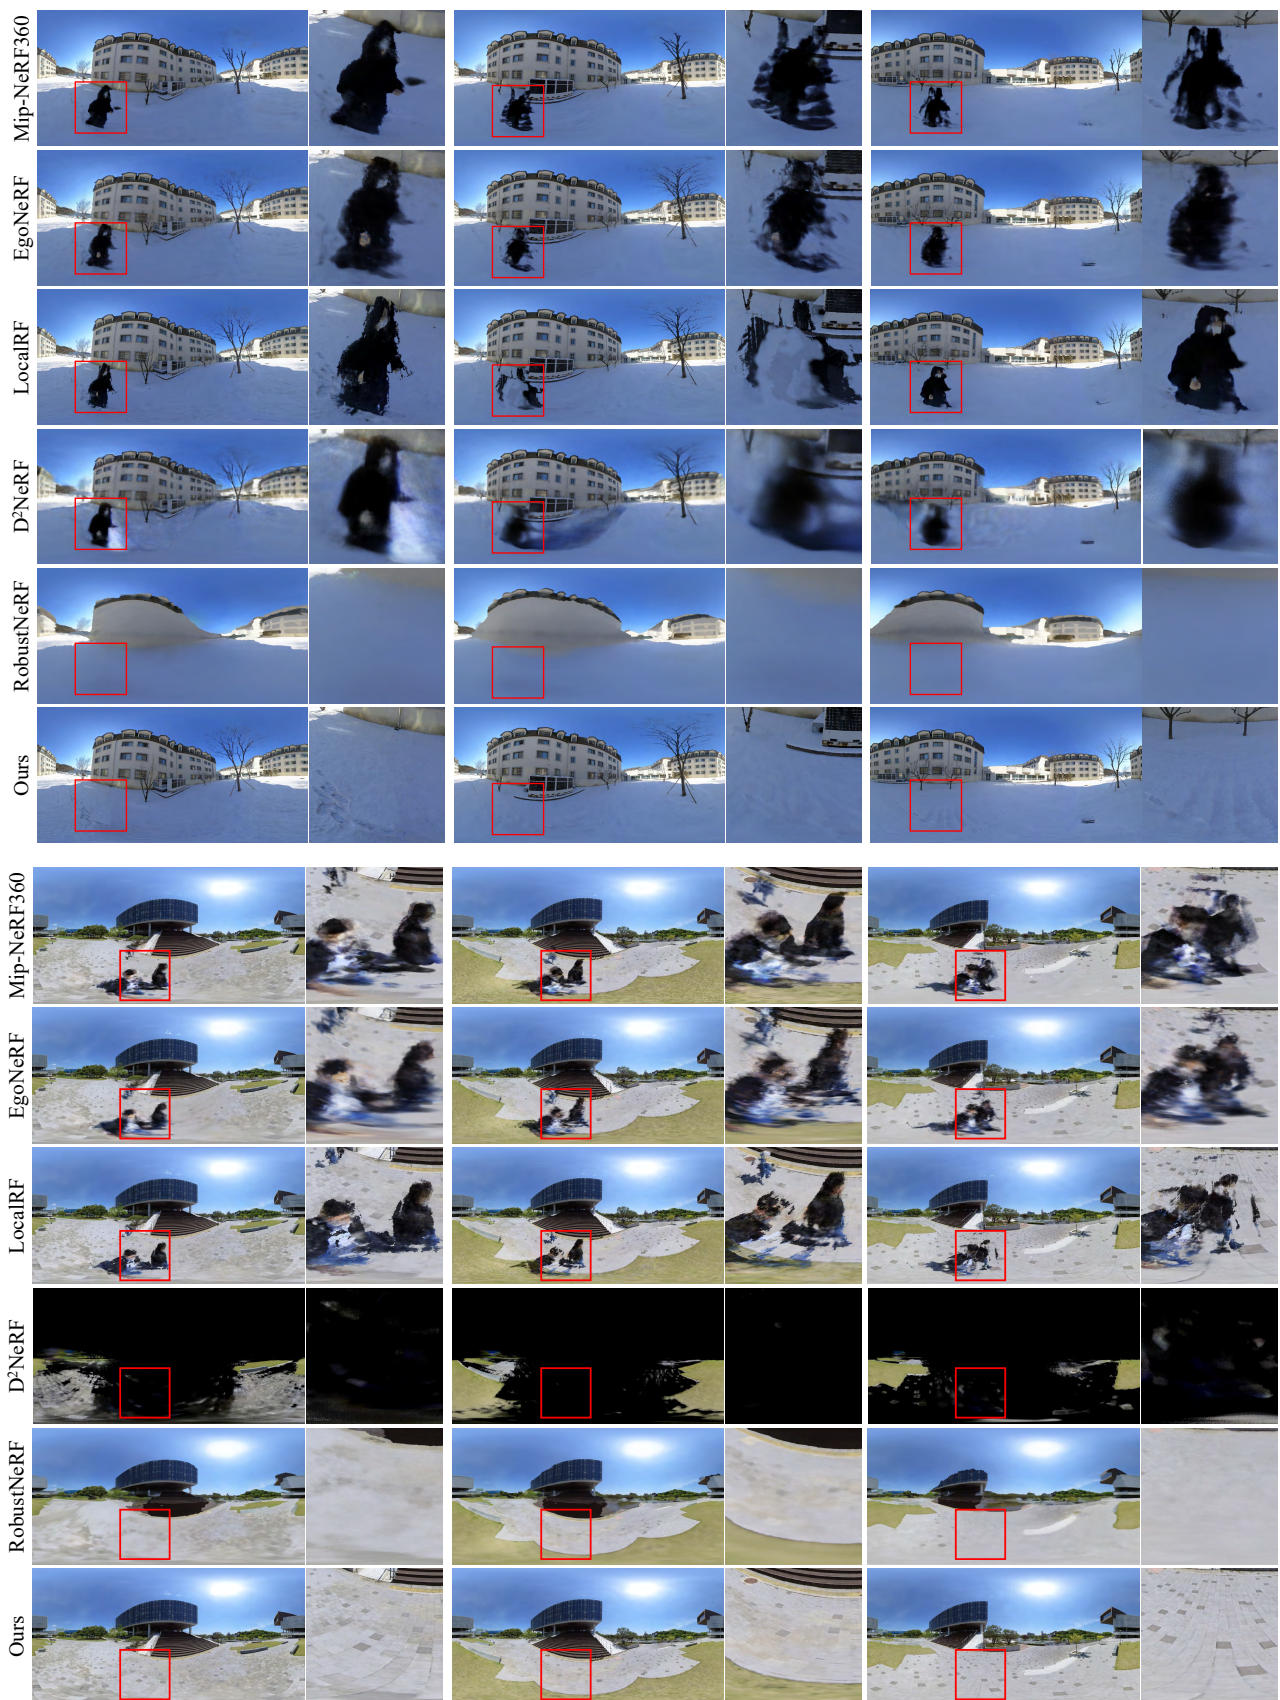

Figure 3. Qualitative comparisons of the *Dormitory* and *Library* scenes in the real dataset

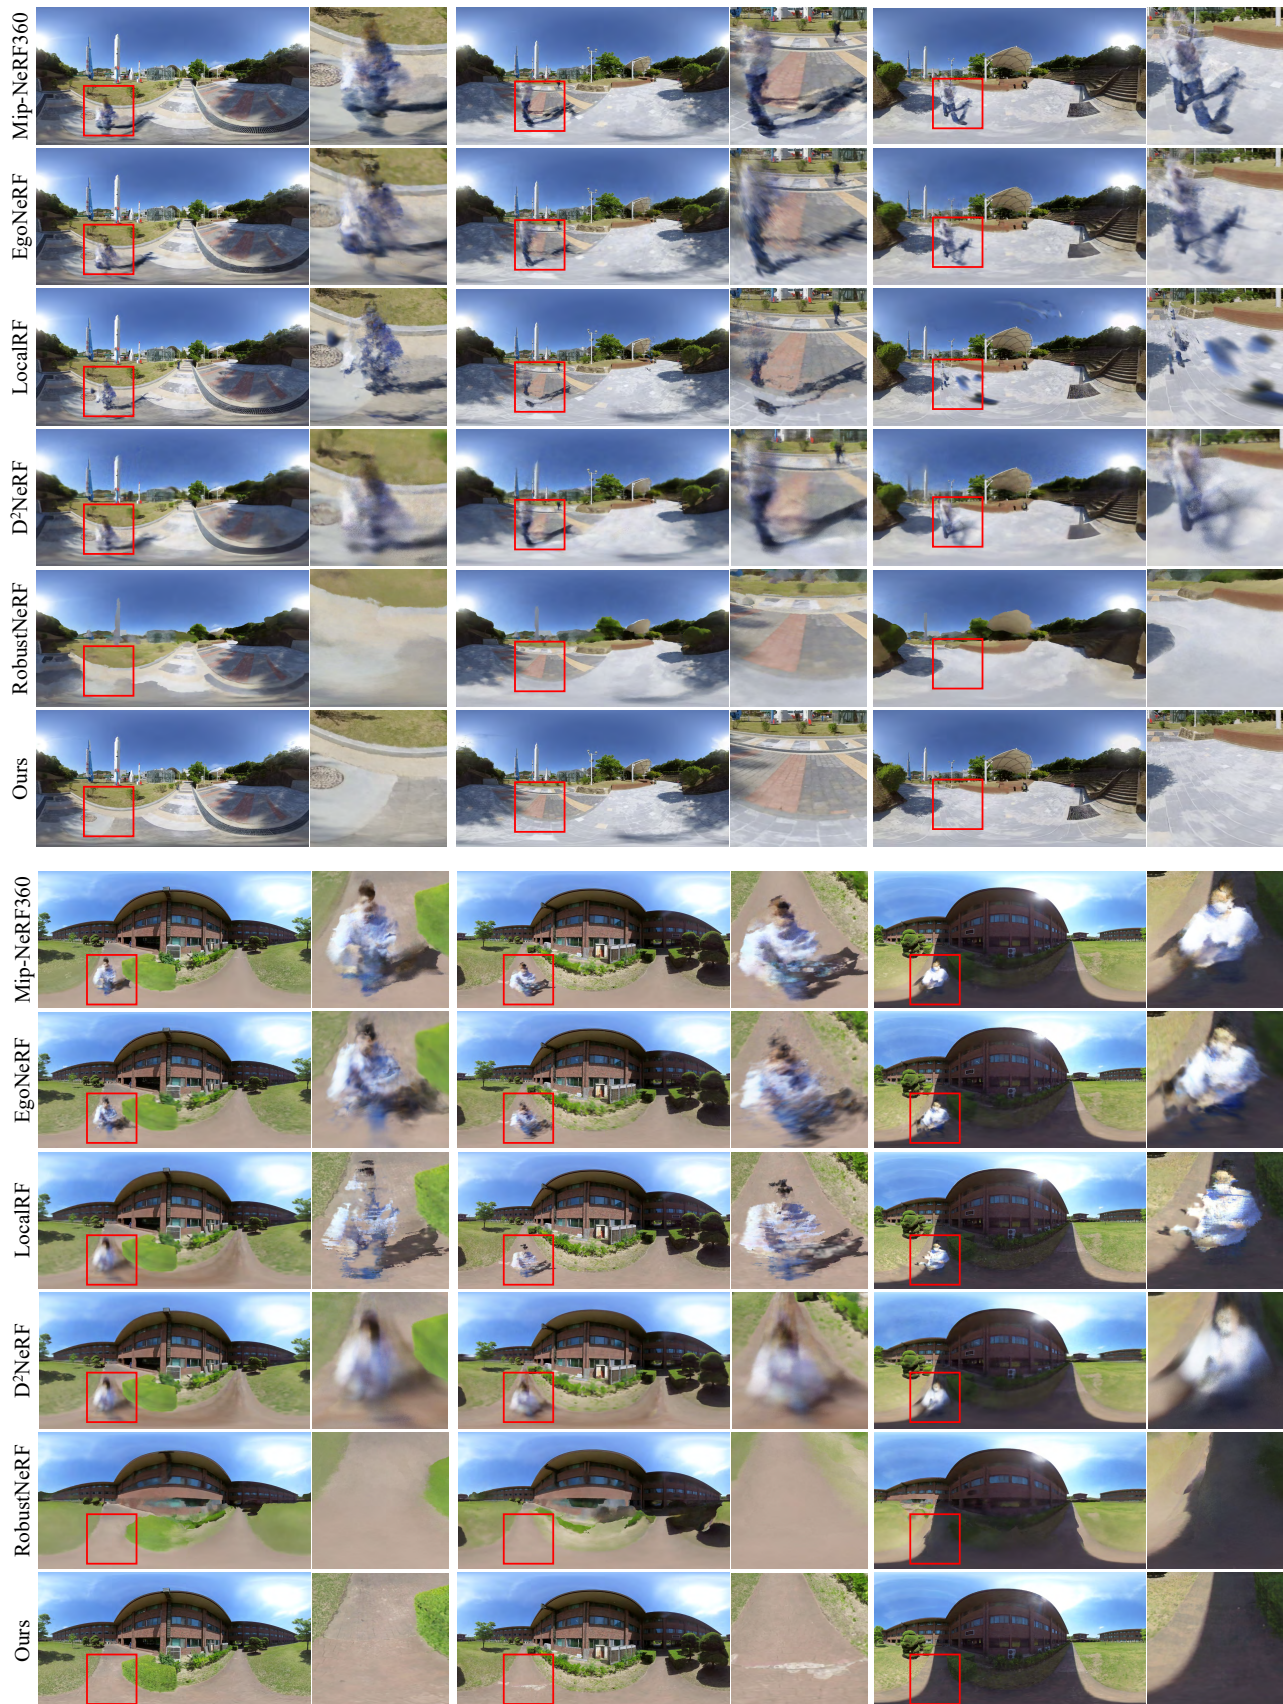

Figure 4. Qualitative comparisons of the *Rocket* and *Red Building* scenes in the real dataset

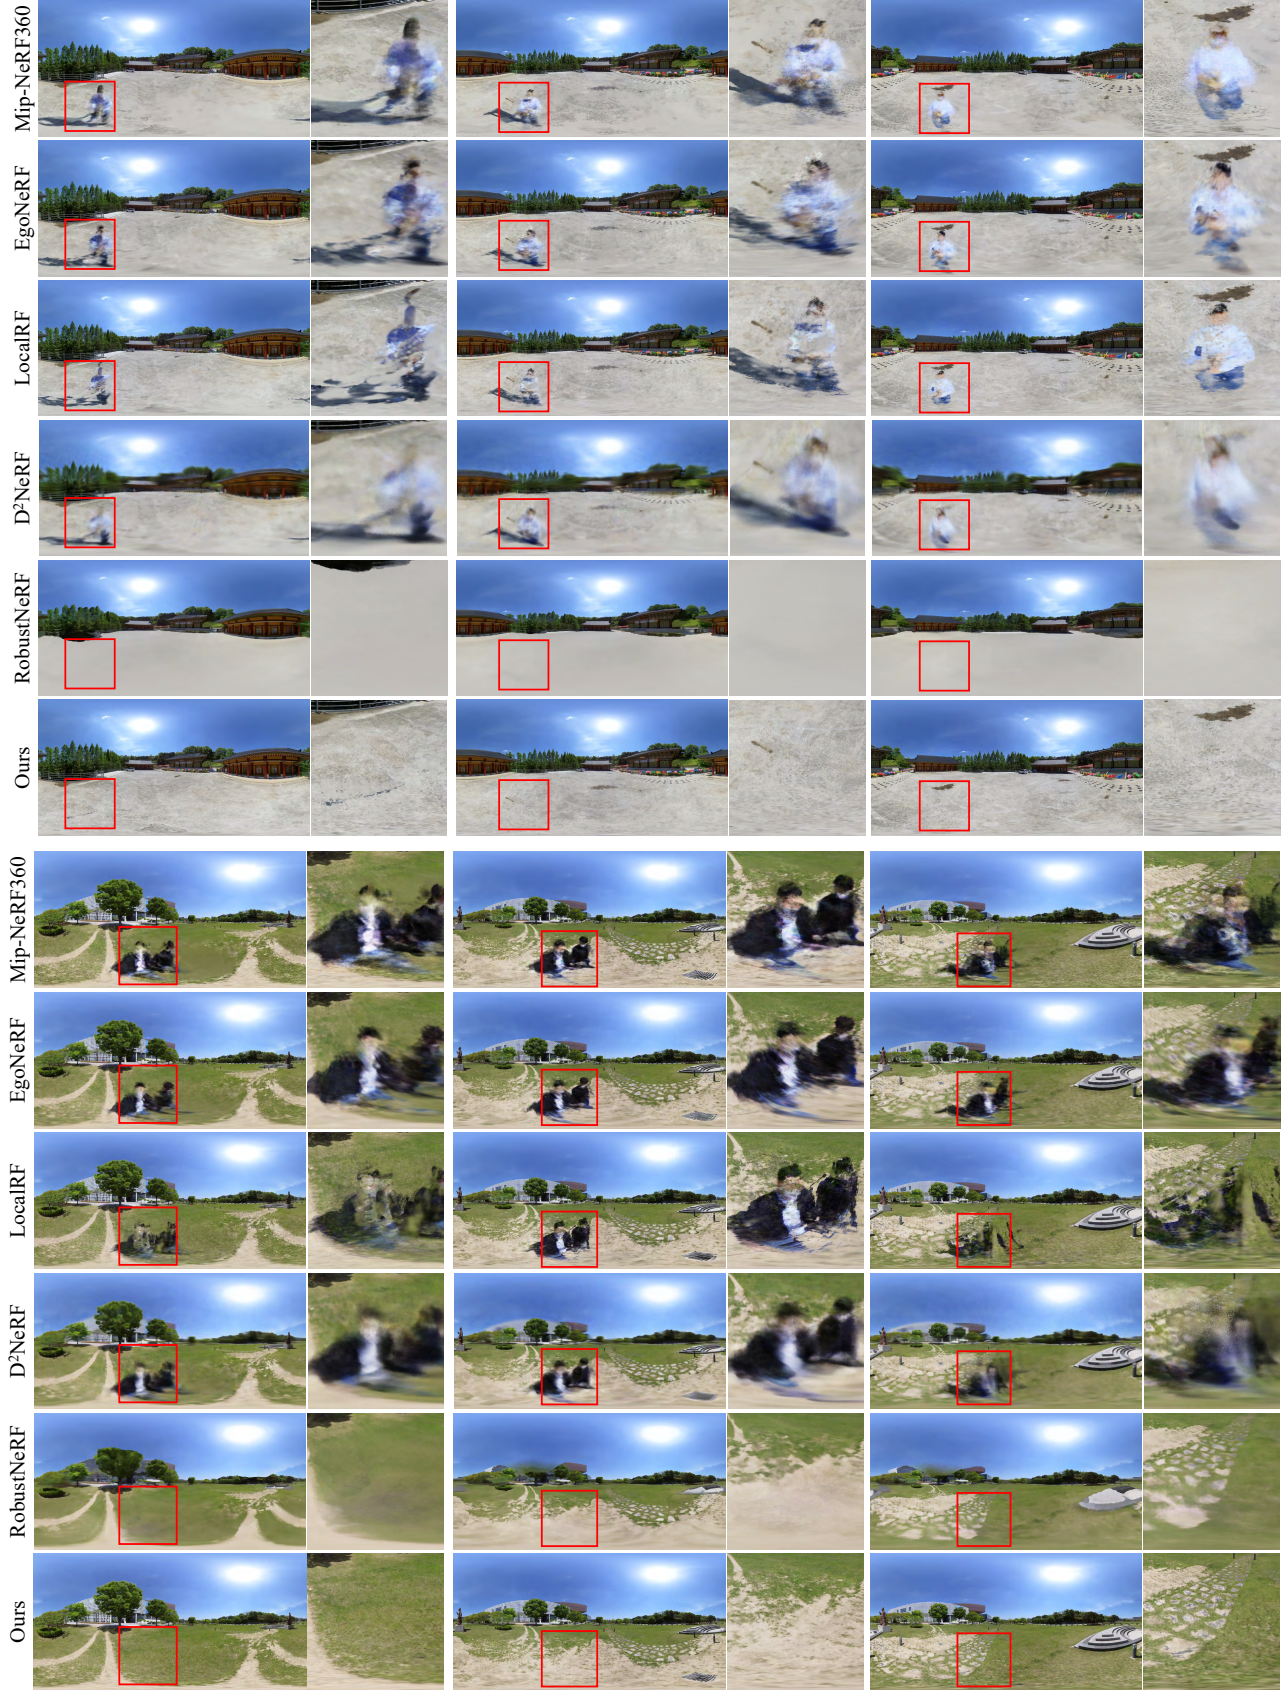

Figure 5. Qualitative comparisons of the *Temple* and *Yongsil* scenes in the real dataset

Table 1. Quantitative comparisons of the real dataset. Refer to Figures 3, 4 and 5 for qualitative comparisons.

|                          | <i>Dormitory</i> |                    |        |                    |        | <i>Library</i> |                    |        |                    |        | <i>Red building</i> |                    |        |                    |        |
|--------------------------|------------------|--------------------|--------|--------------------|--------|----------------|--------------------|--------|--------------------|--------|---------------------|--------------------|--------|--------------------|--------|
|                          | PSNR             | PSNR <sup>ws</sup> | SSIM   | SSIM <sup>ws</sup> | LPIPS  | PSNR           | PSNR <sup>ws</sup> | SSIM   | SSIM <sup>ws</sup> | LPIPS  | PSNR                | PSNR <sup>ws</sup> | SSIM   | SSIM <sup>ws</sup> | LPIPS  |
| Mip-NeRF360 [1]          | 25.95            | 24.70              | 0.8564 | 0.8220             | 0.3837 | 28.02          | 27.75              | 0.8485 | 0.8489             | 0.3280 | 26.60               | 25.77              | 0.7998 | 0.7672             | 0.3719 |
| EgoNeRF [3]              | 26.11            | 24.80              | 0.8404 | 0.7988             | 0.4190 | 27.05          | 26.49              | 0.7977 | 0.7884             | 0.4141 | 25.55               | 24.64              | 0.7557 | 0.7078             | 0.4568 |
| LocalRF [7] w/ pose      | 27.20            | 26.12              | 0.8826 | 0.8589             | 0.3180 | 27.72          | 27.47              | 0.8547 | 0.8540             | 0.2930 | 25.68               | 24.90              | 0.7860 | 0.7492             | 0.3743 |
| D <sup>2</sup> NeRF [10] | 24.96            | 21.72              | 0.7887 | 0.731              | 0.4687 | 4.44           | 4.90               | 0.0733 | 0.0779             | 0.7084 | 25.55               | 25.16              | 0.7487 | 0.7056             | 0.4441 |
| RobustNeRF [9]           | 19.44            | 17.98              | 0.794  | 0.7330             | 0.4850 | 20.78          | 19.23              | 0.7338 | 0.6908             | 0.4738 | 19.91               | 18.49              | 0.7098 | 0.6409             | 0.4974 |
| Ours w/ pose             | 29.10            | 27.86              | 0.8956 | 0.8748             | 0.2992 | 29.61          | 28.81              | 0.8544 | 0.8535             | 0.2970 | 26.03               | 25.18              | 0.8010 | 0.7641             | 0.3534 |
| LocalRF [7] wo/ pose     | 26.59            | 25.48              | 0.8762 | 0.8493             | 0.3227 | 27.70          | 27.35              | 0.8399 | 0.8408             | 0.3096 | 26.56               | 25.75              | 0.8040 | 0.7728             | 0.3452 |
| Ours wo/ pose            | 29.23            | 27.99              | 0.8971 | 0.8767             | 0.2977 | 29.69          | 28.90              | 0.8540 | 0.8538             | 0.2984 | 26.00               | 25.24              | 0.8054 | 0.7713             | 0.3480 |

  

|                          | <i>Rocket</i> |                    |        |                    |        | <i>Temple</i> |                    |        |                    |        | <i>Yongsi</i> |                    |        |                    |        |
|--------------------------|---------------|--------------------|--------|--------------------|--------|---------------|--------------------|--------|--------------------|--------|---------------|--------------------|--------|--------------------|--------|
|                          | PSNR          | PSNR <sup>ws</sup> | SSIM   | SSIM <sup>ws</sup> | LPIPS  | PSNR          | PSNR <sup>ws</sup> | SSIM   | SSIM <sup>ws</sup> | LPIPS  | PSNR          | PSNR <sup>ws</sup> | SSIM   | SSIM <sup>ws</sup> | LPIPS  |
| Mip-NeRF360 [1]          | 27.92         | 27.47              | 0.8531 | 0.8407             | 0.3457 | 27.19         | 27.41              | 0.7458 | 0.7554             | 0.3825 | 25.57         | 25.55              | 0.7531 | 0.7522             | 0.3393 |
| EgoNeRF [3]              | 26.82         | 26.07              | 0.8085 | 0.7857             | 0.4393 | 26.05         | 26.04              | 0.6930 | 0.6961             | 0.4699 | 24.14         | 24.21              | 0.6704 | 0.6781             | 0.4310 |
| LocalRF [7] w/ pose      | 27.14         | 26.61              | 0.8301 | 0.8171             | 0.3959 | 27.08         | 27.45              | 0.7559 | 0.7724             | 0.3537 | 24.56         | 24.76              | 0.7159 | 0.7279             | 0.3475 |
| D <sup>2</sup> NeRF [10] | 25.17         | 24.22              | 0.7576 | 0.7225             | 0.4560 | 23.78         | 22.63              | 0.6398 | 0.6108             | 0.5370 | 23.81         | 23.39              | 0.6548 | 0.6495             | 0.4456 |
| RobustNeRF [9]           | 22.05         | 20.89              | 0.7633 | 0.7214             | 0.4741 | 22.38         | 21.52              | 0.6456 | 0.6259             | 0.5113 | 20.15         | 19.25              | 0.6091 | 0.5953             | 0.4768 |
| Ours w/ pose             | 28.35         | 27.38              | 0.8534 | 0.8359             | 0.3360 | 27.66         | 27.63              | 0.7549 | 0.7663             | 0.3603 | 25.56         | 25.70              | 0.7430 | 0.7566             | 0.3336 |
| LocalRF [7] wo/ pose     | 27.22         | 26.88              | 0.8534 | 0.8396             | 0.3320 | 26.55         | 26.82              | 0.7286 | 0.7462             | 0.3937 | 24.72         | 25.11              | 0.7185 | 0.7418             | 0.3433 |
| Ours wo/ pose            | 28.38         | 27.42              | 0.8544 | 0.8369             | 0.3328 | 27.57         | 27.52              | 0.7494 | 0.7600             | 0.3653 | 25.53         | 25.72              | 0.7387 | 0.7540             | 0.3359 |

Table 2. Quantitative comparisons of the synthetic video dataset where dynamic objects are inserted. Refer to Figure 6 for qualitative comparisons.

|                              | <i>Sponza</i> |                    |        |                    |        | <i>Pavillion</i> |                    |        |                    |        | <i>Lone monk</i> |                    |        |                    |        |
|------------------------------|---------------|--------------------|--------|--------------------|--------|------------------|--------------------|--------|--------------------|--------|------------------|--------------------|--------|--------------------|--------|
|                              | PSNR          | PSNR <sup>ws</sup> | SSIM   | SSIM <sup>ws</sup> | LPIPS  | PSNR             | PSNR <sup>ws</sup> | SSIM   | SSIM <sup>ws</sup> | LPIPS  | PSNR             | PSNR <sup>ws</sup> | SSIM   | SSIM <sup>ws</sup> | LPIPS  |
| Mip-NeRF360 [1], static only | 30.91         | 32.90              | 0.9182 | 0.9183             | 0.2252 | 31.01            | 30.12              | 0.8810 | 0.8736             | 0.2218 | 26.52            | 26.52              | 0.7884 | 0.7966             | 0.3628 |
| Ours wo/ pose, static only   | 34.22         | 34.28              | 0.9339 | 0.8681             | 0.2561 | 29.76            | 28.58              | 0.8532 | 0.8360             | 0.2771 | 26.90            | 27.85              | 0.8167 | 0.8397             | 0.3108 |
| Mip-NeRF360 [1]              | 22.01         | 22.71              | 0.8767 | 0.8464             | 0.2973 | 30.35            | 29.32              | 0.8798 | 0.8715             | 0.2232 | 24.40            | 23.94              | 0.7799 | 0.7858             | 0.3751 |
| EgoNeRF [3]                  | 22.14         | 22.62              | 0.8452 | 0.8379             | 0.3775 | 26.26            | 25.48              | 0.8146 | 0.7983             | 0.3736 | 23.57            | 22.90              | 0.7534 | 0.7491             | 0.4336 |
| LocalRF [7] w/ pose          | 22.39         | 22.87              | 0.8753 | 0.8665             | 0.2725 | 27.19            | 26.35              | 0.8460 | 0.8264             | 0.3115 | 25.67            | 25.66              | 0.8074 | 0.8282             | 0.3213 |
| D <sup>2</sup> NeRF [10]     | 18.05         | 18.72              | 0.5792 | 0.5677             | 0.6481 | 23.38            | 22.51              | 0.6927 | 0.6646             | 0.5912 | 18.31            | 17.05              | 0.5917 | 0.5463             | 0.6501 |
| RobustNeRF [9]               | 18.88         | 18.86              | 0.7242 | 0.7029             | 0.5489 | 24.17            | 23.07              | 0.7706 | 0.7484             | 0.4123 | 18.73            | 17.43              | 0.7031 | 0.6774             | 0.4589 |
| Ours w/ pose                 | 33.00         | 32.91              | 0.9232 | 0.9169             | 0.2008 | 29.37            | 28.21              | 0.8444 | 0.8264             | 0.2845 | 26.29            | 27.01              | 0.8093 | 0.8292             | 0.3194 |
| LocalRF [7] wo/ pose         | 22.33         | 22.76              | 0.8710 | 0.8603             | 0.2781 | 28.02            | 27.07              | 0.8447 | 0.8266             | 0.2758 | 25.31            | 25.23              | 0.8011 | 0.8193             | 0.3309 |
| Ours wo/ pose                | 33.35         | 33.32              | 0.9270 | 0.9210             | 0.1925 | 29.71            | 28.55              | 0.8525 | 0.8357             | 0.2767 | 26.74            | 27.68              | 0.8149 | 0.8377             | 0.3140 |

neural feature planes starts at  $2 \times 10^{-2}$  and exponentially decays to  $2 \times 10^{-3}$ . The learning rate for the camera matrix starts at  $5 \times 10^{-3}$  and exponentially decays to  $5 \times 10^{-4}$ . To prevent excessive change in the mask MLP, which is used to estimate motion masks of entire frames, we set the learning rate to start at  $5 \times 10^{-4}$  and exponentially decay to  $5 \times 10^{-6}$ .

## 2. Motion Mask Estimation

In recent works such as [5, 6], dynamic objects, which are temporally dependent transient data that are independent of global geometry, are excluded under the Bayesian learning framework. This is because dynamic components introduce high epistemic uncertainty, which slows down the learning process and results in high errors when performing tasks such as volume-based view synthesis that require 3D reconstruction. To implicitly address dynamic components, RobustNeRF [9] down-weights the loss of regions with high uncertainty. However, in our approach, we explicitly separate dynamic components from stationary geometry. In the task of predicting dynamic color based on pixel position input imposed on the mask module, the uncertainty of transient data significantly decreases because of a lack of geometrical constraint. Therefore, by performing both tasks simultaneously, the mask module converges faster to predict dynamic color values and alpha values compared to radiance fields. The segmentation of dynamic components allows radiance fields to ignore them during the training process, focusing solely on static elements. Figure 1 shows

Table 3. Our method performs better than existing techniques when training on the real dataset with slightly increased computing time.

|                          | Iteration | Time ↓   | PSNR ↑ | SSIM ↑ | LPIPS ↓ |
|--------------------------|-----------|----------|--------|--------|---------|
| Mip-NeRF360 [1]          | 250K      | 20 hrs   | 26.88  | 0.8094 | 0.3583  |
| EgoNeRF [3]              | 100K      | 5.2 hrs  | 25.95  | 0.7609 | 0.4383  |
| LocalRF [7]              | 155K      | 8.5 hrs  | 26.56  | 0.8034 | 0.3410  |
| D <sup>2</sup> NeRF [10] | 100K      | 6 hrs    | 20.95  | 0.6105 | 0.5100  |
| RobustNeRF [9]           | 500K      | 40 hrs   | 20.78  | 0.7093 | 0.4864  |
| Ours                     | 120K      | 8.7 hrs  | 27.61  | 0.8135 | 0.3372  |
| Ours                     | 155K      | 12.5 hrs | 27.73  | 0.8165 | 0.3297  |

examples of our mask results.

When training the mask module to estimate motion masks, there is a problem with learning dynamic alpha values because of factorization ambiguity. To solve this issue, we supervise the estimated dynamic color by ground truth with added Gaussian noise. This helps to narrow down the possibilities for alpha values, making it easier to obtain a mask closer to a binary value. Without this supervision, the motion mask prediction struggles to reach a binary value, which can result in dynamic artifacts on the static geometry. Refer to Figure 2 to see an illustration of this issue.

## 3. Comparison Details

To compare our results, we use the official implementations of D<sup>2</sup>NeRF [10], EgoNeRF [3], and LocalRF [7]. We employ the Multi-NeRF [8] code for Mip-NeRF360 [1] and RobustNeRF [9]. All experiments are conducted on a machine with a single NVIDIA A6000 GPU and an Intel Xeon

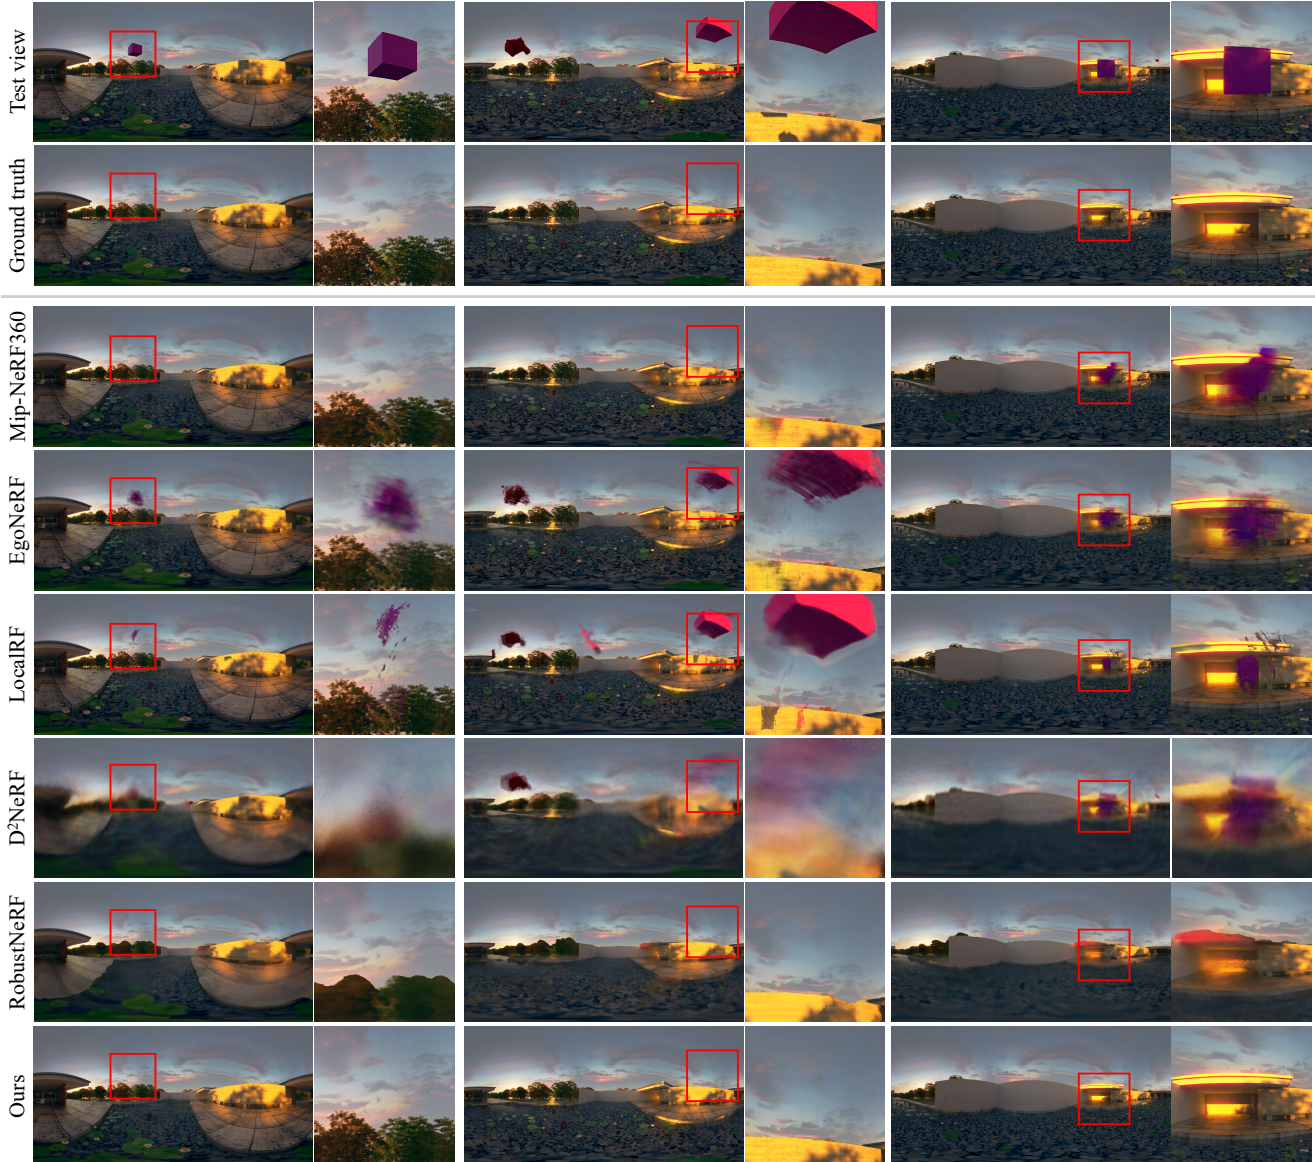

Figure 6. Qualitative comparisons of the *Pavillion* scene in the synthetic video dataset where synthetic moving objects are inserted.

Silver 4214R 2.40 GHz CPU with 256 GB RAM. The baseline methods use the default hyperparameters, including the number of iterations, except for RobustNeRF, for which we use 500K iterations due to its slow convergence by the IRLS-based approach. We present the training time and metrics in Table 3. Additionally, we present the results of our method with 120K iterations, which show comparable training time to LocalRF. We also use the results of our method with 155K iterations, chosen for its ability to capture intricate details.

#### 4. Additional Results

We present additional results for the real dataset. Figures 3, 4, and 5 display the results, and the corresponding metrics are available in Table 1. Additionally, we include the results from the *Pavillion* scene in the synthetic dataset, which is presented in Figure 6. The respective metrics are available in Table 2. We also include the pose estimation results in Figure 7 and Table 4.

#### References

- [1] Jonathan T Barron, Ben Mildenhall, Dor Verbin, Pratul Srinivasan, and Peter Hedman. Mip-NeRF 360: Unbounded

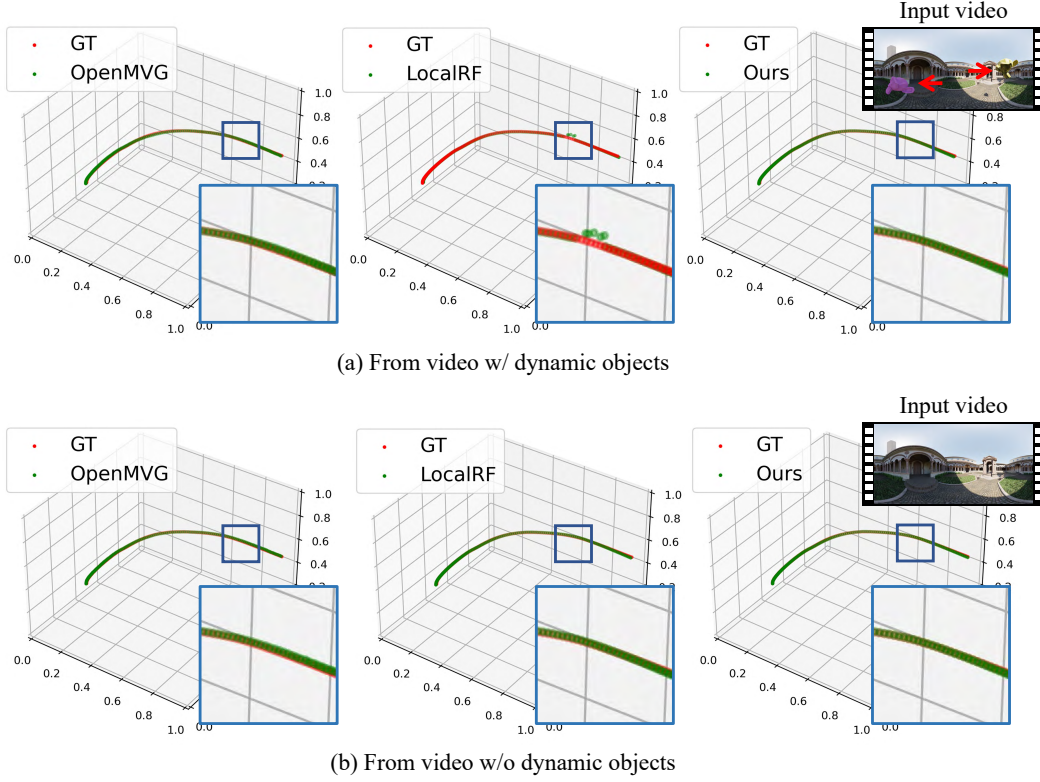

Figure 7. In the *Lone Monk* scene, we compare the estimated pose with the ground-truth pose both with and without dynamic objects. The results with dynamic objects are shown in (a), and without dynamic objects in (b). Our method is capable of robustly estimating frame poses, regardless of the presence of dynamic objects.

Table 4. Quantitative comparisons of the pose accuracy on the synthetic dataset. Our method shows superior performance, especially in scenarios where dynamic objects are present. Refer to Figure 7 for qualitative comparisons.

|                             | <i>Sponza</i>      |                    |         | <i>Pavillion</i>   |                    |         | <i>Lone monk</i>   |                    |         |
|-----------------------------|--------------------|--------------------|---------|--------------------|--------------------|---------|--------------------|--------------------|---------|
|                             | RPE <sub>r</sub> ↓ | RPE <sub>t</sub> ↓ | ATE ↓   | RPE <sub>r</sub> ↓ | RPE <sub>t</sub> ↓ | ATE ↓   | RPE <sub>r</sub> ↓ | RPE <sub>t</sub> ↓ | ATE ↓   |
| OpenMVG                     | 0.09310            | 0.00045            | 0.00032 | 0.17250            | 0.01962            | 0.00347 | 0.05726            | 0.03388            | 0.00263 |
| LocalRF                     | 0.09309            | 0.00074            | 0.00336 | 0.17133            | 0.00065            | 0.00417 | 0.04770            | 0.00145            | 0.00374 |
| Ours                        | 0.09309            | 0.00020            | 0.00207 | 0.17133            | 0.00056            | 0.00116 | 0.04753            | 0.00143            | 0.00236 |
| OpenMVG, <i>static only</i> | 0.09309            | 0.00047            | 0.00036 | 0.17255            | 0.01957            | 0.00332 | 0.05552            | 0.03384            | 0.00195 |
| LocalRF, <i>static only</i> | 0.09309            | 0.00018            | 0.00173 | 0.17133            | 0.00052            | 0.00222 | 0.04753            | 0.00143            | 0.00230 |
| Ours, <i>static only</i>    | 0.09309            | 0.00020            | 0.00207 | 0.17133            | 0.00058            | 0.00135 | 0.04753            | 0.00146            | 0.00153 |

- Anti-Aliased Neural Radiance Fields. In *CVPR*, pages 5470–5479, 2022. 5
- [2] Anpei Chen, Zexiang Xu, Andreas Geiger, Jingyi Yu, and Hao Su. TensoRF: Tensorial Radiance Fields. In *ECCV*, pages 333–350. Springer, 2022. 1
- [3] Changwoon Choi, Sang Min Kim, and Young Min Kim. Balanced Spherical Grid for Egocentric View Synthesis. In *CVPR*, pages 16590–16599, 2023. 5
- [4] Diederik Kingma and Jimmy Ba. Adam: A Method for Stochastic Optimization. In *ICLR*, 2015. 1
- [5] Zhengqi Li, Qianqian Wang, Forrester Cole, Richard Tucker, and Noah Snavely. DynIBaR: Neural Dynamic Image-Based Rendering. In *CVPR*, 2023. 5
- [6] Ricardo Martin-Brualla, Noha Radwan, Mehdi SM Sajjadi, Jonathan T Barron, Alexey Dosovitskiy, and Daniel Duckworth. NeRF in the Wild: Neural Radiance Fields for Unconstrained Photo Collections. In *CVPR*, pages 7210–7219, 2021. 5
- [7] Andreas Meuleman, Yu-Lun Liu, Chen Gao, Jia-Bin Huang, Changil Kim, Min H Kim, and Johannes Kopf. Progressively Optimized Local Radiance Fields for Robust View Synthesis. In *CVPR*, pages 16539–16548, 2023. 1, 5
- [8] Ben Mildenhall, Dor Verbin, Pratul P. Srinivasan, Peter Hedman, Ricardo Martin-Brualla, and Jonathan T. Barron. MultiNeRF: A Code Release for Mip-NeRF 360, Ref-NeRF, and RawNeRF, 2022. 5
- [9] Sara Sabour, Suhani Vora, Daniel Duckworth, Ivan Krasin, David J Fleet, and Andrea Tagliasacchi. RobustNeRF: Ignoring Distractors with Robust Losses. In *CVPR*, pages 20626–20636, 2023. 5

- [10] Tianhao Wu, Fangcheng Zhong, Andrea Tagliasacchi, Forrester Cole, and Cengiz Oztireli. D2NeRF: Self-Supervised Decoupling of Dynamic and Static Objects from a Monocular Video. *NIPS*, 35:32653–32666, 2022. [1](#), [5](#)
- [11] Wentao Yuan, Zhaoyang Lv, Tanner Schmidt, and Steven Lovegrove. STaR: Self-supervised Tracking and Reconstruction of Rigid Objects in Motion with Neural Rendering. In *CVPR*, pages 13144–13152, 2021. [1](#)
